# Supplementary material
Source: HighWire-hosted journal article supplement (https://nutrition.bmj.com/content/bmjnph-2020-000117)
Supplement: inline-supplementary-material-1 [file inline-supplementary-material-1.pdf]

**Nutritank Medical students survey****Question 1:**

Nutrition plays a role in maintaining good health

Strongly disagree to Strongly agree

**Question 2:**

Nutrition plays a role in the development of disease

Strongly disagree to Strongly agree

**Question 3:**

Nutrition plays a role in the management of disease

Strongly disagree to Strongly agree

**Question 4:**

I have had teaching on nutrition during medical school

Strongly disagree to Strongly agree

**Question 5:**

How many hours of teaching have you received on nutrition in the last academic year?

(includes lectures, tutorials, e-learning)

0-2, 3-4, 5-6, 7-8, 9-10, >10 hours

**Question 6:**

The teaching I have received on nutrition at medical school is adequate for my learning needs

Strongly disagree to Strongly agree

**Question 7:**

I would like to receive more teaching on nutrition at medical school

Strongly disagree to Strongly agree

**Question 8:**

How do you think more teaching could be incorporated into the curriculum?

Lectures, Student selected components, e-learning, workshops, ward based, other

**Question 9:**

What barriers are there to increased nutrition education in the medical school curriculum

Time, Awareness, Not relevant, lack of interest, lack of staff, other

**Question 10:**

I believe patients expect me to have an understanding of nutrition as a doctor

Strongly disagree to Strongly agree
