# Supplementary material
Source: HighWire-hosted journal article supplement (https://nutrition.bmj.com/content/bmjnph-2020-000117)
Supplement: inline-supplementary-material-2 [file inline-supplementary-material-2.pdf]

## Survey Questionnaire

### Nutrition Education in Medical School

All information provided will be treated exclusively confidential and for research purposes only

#### Basic Information

1. Age
2. Nationality (country)
3. Current Year of study?
4. Medium of instruction of study.  
English  Chinese  Other (Specify)

#### Perceived significance of nutrition

5. Do you agree that nutrition plays a role in maintaining good health?  
Strongly disagree  Disagree  Agree  Strongly agree
6. Do you agree that nutrition plays a role in the development of disease?  
Strongly disagree  Disagree  Agree  Strongly agree
7. Do you believe nutrition plays a role in the management of disease?  
Yes  No  Not sure
8. On a scale of 1-5, with 1 being not important and 5 being very important, score the importance of nutrition in your medical school

#### Country-specific Nutrition situation

9. How important is nutrition considered in your home country?  
Very Important  Important  Not so important  Not sure

10. What nutrition related diseases/conditions are prevalent in your country?

**11. With your current knowledge level, can you confidently handle these cases (in 24) by the time you complete your medical education?**

Yes  No  Not sure

**12. How frequently are you asked about nutrition or nutrition related questions by people because you are a medical student?**

Very often  Often  Rarely  Never

**13. Are there any specific general dietary/nutrition guidelines or recommendations in your country?**

Yes  No  Not aware

**14. Can you name any specific ones?**

### **Nutrition component of school Curriculum**

**15. Do you think practitioners of your profession should have more knowledge about nutrition?**

Strongly disagree  Disagree  Agree  Strongly agree

**16. How many teaching hours have you received on nutrition or nutrition related topics in the past academic year?**

None  1-2  3-4  5-6  7-8  9-10  Above 10

**17. Would you say the current teaching/training you've received in nutrition is enough for your learning needs?**

Yes  No  Not sure

**18. Do you think you've been prepared enough to offer guidance/advice to your patients about nutrition and diets in relations to health and diseases?**

Strongly disagree  Disagree  Not sure  Agree  Strongly agree

**19. Does school offer practice training for nutrition course/topics?**

Yes  No

**20. Is the nutrition course/topics required or elective?**

**21. Would you welcome more nutrition education/knowledge?**

Yes  No  Not sure

**22. What are your expectations in the area of nutrition education?**

**23. What kind of benefit do you want to get from nutrition education of your curriculum?**

**24. How do you think more teaching on nutrition can be incorporated into your curriculum/syllabus?**

### Perceived general nutritional knowledge

**25. What general nutrition guidance/recommendations do you know about each of these categories of people?**

**i. Pregnant women**

**ii. Lactating mothers**

**iii. Infants 0-6months**

**iv. Diabetics**

**v. Hypertensives**

**vi. Overweight and Obesity**

**vii. Under-nutrition (wasting/Marasmus)****26. Please rate your overall ability and confidence to give advice/guidance about nutrition?**

Not confident at all     Not very confident     Somewhat confident   
Very confident     Extremely confident

**27. When you become a doctor, do you think your patients would expect you to have an understanding of nutrition?**

Yes     No     Maybe

**28. Where do you see boundaries in clinical implementation of nutrition?**

Time     Awareness     Not relevant     Lack of interest   
Lack of staff     others
