# Supplementary material
Source: HighWire-hosted journal article supplement (https://nutrition.bmj.com/content/bmjnph-2020-000117)
Supplement: inline-supplementary-material-3 [file inline-supplementary-material-3.pdf]

**Supplementary Table 1: List of Nutrition-related conditions prevalent in Students' home countries**

| Condition                  | Frequency              |                       |       |            | Total |
|----------------------------|------------------------|-----------------------|-------|------------|-------|
|                            | International Students | Home-country Students |       |            |       |
|                            |                        | Ghana                 | India | Montenegro |       |
| Severe-Acute Malnutrition  | 43                     | 31                    | 9     | 0          | 83    |
| Obesity                    | 14                     | 8                     | 2     | 9          | 33    |
| Diabetes                   | 13                     | 19                    | 2     | 12         | 46    |
| Cardiovascular Diseases    | 11                     | 12                    | 3     | 9          | 35    |
| Micronutrient Deficiencies | 18                     | 11                    | 3     | 2          | 34    |
| Others                     | 14                     | 2                     | 2     | 4          | 22    |
