# Supplementary material
Source: HighWire-hosted journal article supplement (https://nutrition.bmj.com/content/bmjnph-2020-000117)

**A**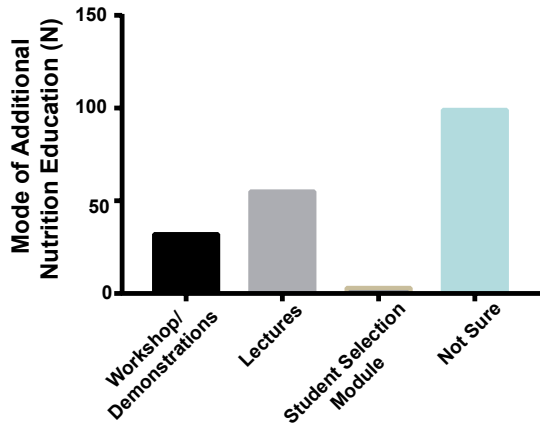**B**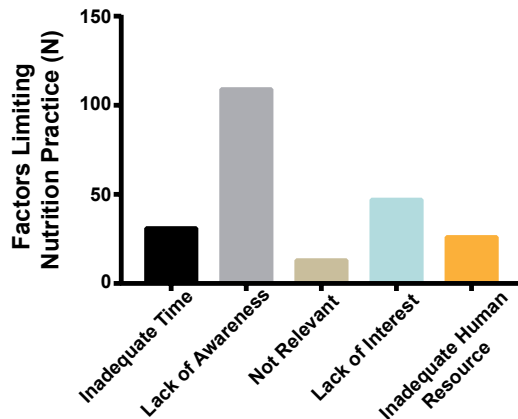

Supplementary Figure 1

Supplement: inline-supplementary-material-4 [file inline-supplementary-material-4.pdf]
